# Supplementary material
Source: Royal Society of Chemistry journal article supplement (doi:10.1039/d6ta02610a)
Supplement: d6ta02610a1.pdf [file d6ta02610a1.pdf]

|               | (6.44%) |         |      |       | (70.4°, 43.4°, 38.0°) |       |
|---------------|---------|---------|------|-------|-----------------------|-------|
| CQDs, NCQDs-  | 5.7%    | 5nm     | 0.75 | 39.08 | 88.80                 |       |
| 12, NCQDs-14, | 6.7%    |         | 0.14 | 22.86 | 84.14                 |       |
| NCQDs-16      | 10.1%   |         | 0.1  | 28.88 | 64.26                 | 17.71 |
|               | 14.5%   | 2.5-3nm | 0.08 | 35.38 | 80.40                 |       |

## Section I. Estimated average particle size of NCQDs

### 1.1 Moles of n-C<sub>12</sub>H<sub>25</sub>Cl

The molecular weight of n-C<sub>12</sub>H<sub>25</sub>Cl is 204.8 g·mol<sup>-1</sup>. Thus, 1 g of n-C<sub>12</sub>H<sub>25</sub>Cl corresponds to 4.88 × 10<sup>-3</sup> mol.

### 1.2 Estimation of the Equivalent Molar Amount of NCQDs

NCQDs do not have a precise molecular weight. Therefore, an equivalent molar amount was estimated by assuming spherical particles with an average diameter of 5 nm and a density of approximately 1.8 g·cm<sup>-3</sup>, following common practice for carbon nanomaterials.

$$\text{Parameter: } r=2.5 \times 10^{-7} \text{ cm}$$

$$\text{Single particle volume: } V=4\pi r^3/3=6.5 \times 10^{-20} \text{ cm}^3$$

$$\text{Single particle mass: } m=\rho V=1.17 \times 10^{-19} \text{ g}$$

$$\text{Number of particles in 1 g NCQDs: } N=8.5 \times 10^{18}$$

$$\text{Equivalent molar quantity: } n=N/N_A \approx 1.4 \times 10^{-5} \text{ mol}$$

### 1.3 Equivalent Molar Ratio

Based on the above estimation, the equivalent molar ratio of n-C<sub>12</sub>H<sub>25</sub>Cl to NCQDs is approximately 350:1, indicating that the alkylating agent was used in excess to ensure efficient surface modification.

## Section II. Deconvolution fitting parameters

**Table S2 XPS atomic composition**

| Surfactant | C (%) | N (%) | O (%) | Quaternary fraction (%) |
|------------|-------|-------|-------|-------------------------|
| NCQDs      | 52.9  | 27.8  | 19.3  | 0                       |
| NCQDs-12   | 53.8  | 27.1  | 19.1  | 25                      |
| NCQDs-14   | 54.7  | 26.5  | 18.8  | 24                      |
| NCQDs-16   | 55.3  | 25.9  | 18.7  | 22                      |

**Table S3 Deconvolution fitting parameters of C 1s**

| Peak | Binding energy | Area (%) |
|------|----------------|----------|
|------|----------------|----------|

|          |         | (eV)     |    |
|----------|---------|----------|----|
|          | C-C/C=C | 284.8 eV | 58 |
| NCQDs    | C-O/C-N | 286.2 eV | 30 |
|          | C=O     | 288.6rV  | 12 |
|          | C-C/C=C | 284.8 eV | 68 |
| NCQDs-12 | C-O/C-N | 286.2 eV | 23 |
|          | C=O     | 288.6rV  | 9  |
|          | C-C/C=C | 284.8 eV | 72 |
| NCQDs-14 | C-O/C-N | 286.2 eV | 20 |
|          | C=O     | 288.6rV  | 8  |
|          | C-C/C=C | 284.8 eV | 76 |
| NCQDs-16 | C-O/C-N | 286.2 eV | 17 |
|          | C=O     | 288.6rV  | 7  |

**Table S4 Deconvolution fitting parameters of N 1s**

|          |                  | Binding energy<br>(eV) | Area (%) |
|----------|------------------|------------------------|----------|
| NCQDs    | Pyridinic N      | 398.14 eV              | 55.7     |
|          | Pyrrolic/amine N | 399.80 eV              | 44.3     |
| NCQDs-12 | Pyridinic N      | 398.27 eV              | 49.8     |
|          | Pyrrolic/amine N | 399.44 eV              | 24.5     |
|          | Quaternary N     | 400.78 eV              | 28.7     |
| NCQDs-14 | Pyridinic N      | 398.11 eV              | 61.0     |
|          | Pyrrolic/amine N | 399.30 eV              | 18.6     |
|          | Quaternary N     | 400.72 eV              | 20.4     |
| NCQDs-16 | Pyridinic N      | 398.11 eV              | 57.2     |
|          | Pyrrolic/amine N | 399.39 eV              | 20.7     |
|          | Quaternary N     | 400.85 eV              | 22.1     |

**Table S5 Deconvolution fitting parameters of O 1s**

|          |     | Binding energy<br>(eV) | Area (%) |
|----------|-----|------------------------|----------|
| NCQDs    | C-O | 530.92                 | 34.6     |
|          | C=O | 529.99                 | 65.4     |
| NCQDs-12 | C-O | 531.04                 | 41.2     |
|          | C=O | 530.24                 | 58.8     |

|          |     |        |      |
|----------|-----|--------|------|
| NCQDs-14 | C-O | 531.41 | 48.5 |
|          | C=O | 529.97 | 51.5 |
| NCQDs-16 | C-O | 531.18 | 45.1 |
|          | C=O | 529.97 | 54.9 |

### Section III. Calculation of Quantum Yield

The absolute fluorescence quantum yields of the prepared NCQDs and NCQDs-n were determined using a comparative method with quinine sulfate as the reference.

#### 3.1 Sample Preparation

The samples were diluted to ensure that the optical density (OD) at the excitation wavelength did not exceed 0.1 to minimize inner filter effects. Quinine sulfate was prepared at a comparable OD under the same conditions. Fluorescence emission spectra of both the sample and the reference were recorded using a fluorescence spectrometer with excitation wavelengths selected according to the maximum absorption of each sample. All measurements were corrected for the spectral response of the instrument.

#### 3.2 Quantum Yield Calculation

The relative quantum yield was calculated using the following equation:

$$\Phi_{\text{sample}} = \Phi_{\text{ref}} \cdot \frac{I_{\text{sample}}}{I_{\text{ref}}} \cdot \frac{I_{\text{ref}}}{I_{\text{sample}}} \cdot \left(\frac{n_{\text{sample}}}{n_{\text{ref}}}\right)^2$$

where:

$\Phi_{\text{sample}}$  and  $\Phi_{\text{ref}}$  are the quantum yields of the sample and reference, respectively.

$I_{\text{sample}}$  and  $I_{\text{ref}}$  are the integrated fluorescence intensities.

$A_{\text{sample}}$  and  $A_{\text{ref}}$  are the absorbances at the excitation wavelength.

$n_{\text{sample}}$  and  $n_{\text{ref}}$  are the refractive indices of the solvents used for the sample and reference, respectively.

#### 3.3 Reproducibility

All measurements were repeated three times, and the reported quantum yields represent the average values with standard deviations.

### Section IV.

#### a) Mobility ratio

$$M = \frac{\lambda_{\text{displacing}}}{\lambda_{\text{displaced}}} = \frac{k_{rw}/\mu_w}{k_{ro}/\mu_o}$$

$k_{rw}$  and  $k_{ro}$  represent the relative permeability of water and oil phase, respectively;

$\mu_w$  and  $\mu_o$  donate the viscosity of water and oil phase, respectively.

**b) Residue resistance factor,  $R_f$**

$$R_f = \frac{k_{w, \text{before}}}{k_{w, \text{after}}}$$

$k_{w, \text{before}}$  is water phase permeability before water injection;

$k_{w, \text{after}}$  is water phase permeability after injecting displacement fluid.

**Section V.**

**Table S6 Interfacial tension data vs salinity.**

|    | NCQDs   | NCQDs-12 | NCQDs-14 | NCQDs-16 |
|----|---------|----------|----------|----------|
| 0  | 2.24351 | 0.74495  | 0.05161  | 0.01934  |
| 1  | 2.20205 | 0.57581  | 0.02757  | 0.01114  |
| 3  | 1.28904 | 0.36236  | 0.01997  | 0.00601  |
| 5  | 1.08851 | 0.31371  | 0.01728  | 0.00502  |
| 7  | 0.92605 | 0.28629  | 0.01547  | 0.00422  |
| 10 | 0.40525 | 0.11131  | 0.01408  | 0.00445  |

**Table S7 Surface tension data.**

| Mass concentration (mg·L <sup>-1</sup> ) | NCQDs | NCQDs-12 | NCQDs-14 | NCQDs-16 |
|------------------------------------------|-------|----------|----------|----------|
| 1E-3                                     | 70.96 | 70.38    | 71.92    | 71.58    |
| 0.005                                    | 68.53 | 66.19    | 57.29    | 62.79    |
| 0.01                                     | 66.63 | 57.06    | 50.79    | 59.92    |
| 0.025                                    | 65.81 | 45.62    | 43.09    | 49.25    |
| 0.05                                     | 58.93 | 35.16    | 35.39    | 41.55    |
| 0.075                                    | 55.03 | 30.87    | 32.34    | 35.49    |
| 0.1                                      | 52.88 | 28.2     | 28.88    | 34.94    |
| 0.2                                      | 46.12 | 26.14    | 27.57    | 32.52    |

|     |       |       |       |       |
|-----|-------|-------|-------|-------|
| 0.5 | 40.76 | 26.35 | 27.25 | 31.09 |
| 1   | 38.93 |       |       |       |
| 2   | 38.63 |       |       |       |

**Table S8 Coreflood oil production data.**

| Injected volume<br>(PV) | 1231                       |                     | NCQDs-14                   |                     |
|-------------------------|----------------------------|---------------------|----------------------------|---------------------|
|                         | Injected pressure<br>(MPa) | Oil recovery<br>(%) | Injected pressure<br>(MPa) | Oil recovery<br>(%) |
| 0                       | 0.05                       | 0                   | 0.09                       | 0                   |
| 1                       | 0.21                       | 1.71                | 0.28                       | 3.43                |
| 2                       | 0.53                       | 4.1                 | 0.62                       | 7.14                |
| 3                       | 0.89                       | 8.53                | 1.01                       | 14.57               |
| 4                       | 1.27                       | 17.41               | 1.84                       | 23.43               |
| 5                       | 1.82                       | 27.99               | 2.52                       | 33.14               |
| 6                       | 2.31                       | 39.59               | 3.04                       | 44.29               |
| 7                       | 2.64                       | 52.9                | 3.29                       | 50.86               |
| 8                       | 2.89                       | 54.95               | 3.47                       | 57.14               |
| 9                       | 3.12                       | 56.31               | 3.52                       | 58.57               |
| 10                      | 3.24                       | 57                  | 3.58                       | 59.14               |
| 11                      | 3.26                       | 57.34               | 3.61                       | 59.43               |
| 12                      | 3.29                       | 57.68               | 3.65                       | 59.71               |
| 13                      | 3.3                        | 58.02               | 3.69                       | 60                  |
| 14                      | 3.31                       | 58.02               | 3.72                       | 60                  |
| 15                      | 3.31                       | 58.02               | 3.72                       | 60                  |
| 16                      | 3.27                       | 58.02               | 3.72                       | 60                  |
| 16.5                    | 3.21                       | 58.36               | 3.67                       | 60.29               |
| 17                      | 3.15                       | 59.04               | 3.61                       | 61.43               |
| 17.5                    | 3.13                       | 60.07               | 3.49                       | 68                  |
| 18                      | 3.11                       | 61.43               | 3.43                       | 72.57               |
| 18.5                    | 3.1                        | 62.12               | 3.37                       | 74.57               |
| 19                      | 3.09                       | 62.46               | 3.32                       | 74.86               |
| 19.5                    | 3.09                       | 62.8                | 3.31                       | 74.86               |
| 20                      | 3.09                       | 63.14               | 3.3                        | 74.86               |
| 21                      | 3.08                       | 63.14               | 3.3                        | 75.14               |
| 22                      | 3.06                       | 63.48               | 3.28                       | 75.71               |
| 23                      | 3.05                       | 63.82               | 3.26                       | 76.57               |
| 24                      | 3.04                       | 64.16               | 3.2                        | 77.14               |

|    |      |       |      |       |
|----|------|-------|------|-------|
| 25 | 3.03 | 64.16 | 3.14 | 77.43 |
| 26 | 3.02 | 64.51 | 3.12 | 77.71 |
| 27 | 3.01 | 64.51 | 3.11 | 77.71 |
| 28 | 2.99 | 64.51 | 3.11 | 77.71 |
| 29 | 2.99 | 64.51 | 3.11 | 77.71 |
| 30 | 2.99 | 64.51 | 3.11 | 77.71 |

**Figure S1 Figure of contact angle.**

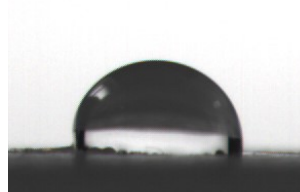

Primitive

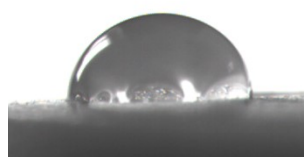

NCQDs

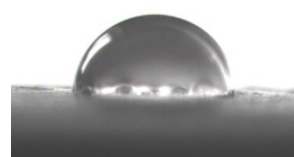

NCQDs-12

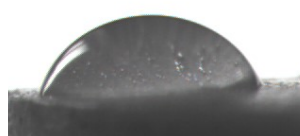

NCQDs-14

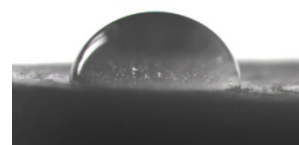

NCQDs-16
